# Supplementary material
Source: publisher figshare collection journal article supplement (https://acs.figshare.com/ndownloader/files/5216062)
Supplement: Supplementary file 1 [file 5216062]

data_publication_text 


data_compound6

#  1. SUBMISSION DETAILS

_publ_contact_author
;     Jos\'e Norberto Farf\'an-Garc\'ia

      Departamento de Qu\'imica
      Centro de Investigaci\'on y de Estudios Avanzados
      del Instituto Polit\'ecnico Nacional
      Apartado Postal 14-740
      07000 M\'exico, D.F.
      M\'exico

;
_publ_contact_author_phone    52(55)50613721
_publ_contact_author_fax            52(55)57477113
_publ_contact_author_email       jfarfan@correo.cinvestav.mx
_publ_requested_journal             Journal of Organometallic Chemistry

#  3. TITLE AND AUTHOR LIST

_publ_section_title
;
'Second Harmonic Generation within the P212121 Space Group,
in a Series of Chiral (Salicylaldiminato)tin Schiff Base Complexes.'
;
;

loop_
_publ_author_name
_publ_author_address
'      Jos\'e Mar\'ia Rivera Villanueva'
;     Departamento de Qu\'imica
      Centro de Investigaci\'on y de Estudios Avanzados
      del Instituto Polit\'ecnico Nacional
      Apartado Postal 14-740
      07000 M\'exico, D.F.
      M\'exico
;
'      Horacio Reyes P\'erez'
;     Departamento de Qu\'imica
      Centro de Investigaci\'on y de Estudios Avanzados
      del Instituto Polit\'ecnico Nacional
      Apartado Postal 14-740
      07000 M\'exico, D.F.
      M\'exico
;
'      Rosa SAntill\'an Baca'
;     Departamento de Qu\'imica
      Centro de Investigaci\'on y de Estudios Avanzados
      del Instituto Polit\'ecnico Nacional
      Apartado Postal 14-740
      07000 M\'exico, D.F.
      M\'exico
;
'      Pascal G. Lacroix'
;     Laboratoire de Chimie de Coordinacion du CNRS
      205 Route de Narbonne
      31077 Toulose cedex 04 
      France     
;
'      Christine Lepetit'
;     Laboratoire de Chimie de Coordinacion du CNRS
      205 Route de Narbonne
      31077 Toulose cedex 04 
      France
;
'      Keitaro Nakatani'
;     Laboratoire de Photophysique et Photochimie
      Supramol\'eculaires et Macromol\'eculaires
      (UMR8531 du CNRS), Ecole Normale Sup\'erieure de Cachan
      Avenue du president Wilson, 94235, Cachan 
      France
 
_audit_creation_method            SHELXL-97
_chemical_name_systematic
;
 2,2-diphenyl-5-(1H-indole-3-methyl)-(4�-diethylaminobenzo[h])-6-aza-1,3-dioxa-6-en-2-stannacyclononen-4-one
;
_chemical_name_common             ?
_chemical_melting_point           202-206o
_chemical_formula_moiety          ?
_chemical_formula_sum             'C34H33N3O3Sn�H2O'
_chemical_formula_weight          649.32
 
loop_
 _atom_type_symbol
 _atom_type_description
 _atom_type_scat_dispersion_real
 _atom_type_scat_dispersion_imag
 _atom_type_scat_source
 'C'  'C'   0.0033   0.0016
 'International Tables Vol C Tables 4.2.6.8 and 6.1.1.4'
 'H'  'H'   0.0000   0.0000
 'International Tables Vol C Tables 4.2.6.8 and 6.1.1.4'
 'N'  'N'   0.0061   0.0033
 'International Tables Vol C Tables 4.2.6.8 and 6.1.1.4'
 'O'  'O'   0.0106   0.0060
 'International Tables Vol C Tables 4.2.6.8 and 6.1.1.4'
 'Sn'  'Sn'  -0.6537   1.4246
 'International Tables Vol C Tables 4.2.6.8 and 6.1.1.4'
 
_symmetry_cell_setting            ?
_symmetry_space_group_name_H-M    P212121
 
loop_
 _symmetry_equiv_pos_as_xyz
 'x, y, z'
 '-x+1/2, -y, z+1/2'
 'x+1/2, -y+1/2, -z'
 '-x, y+1/2, -z+1/2'
 
_cell_length_a                    9.861
_cell_length_b                    11.841
_cell_length_c                    26.763
_cell_angle_alpha                 90.00
_cell_angle_beta                  90.00
_cell_angle_gamma                 90.00
_cell_volume                      3125.0
_cell_formula_units_Z             4
_cell_measurement_temperature     293(2)
_cell_measurement_reflns_used     ?
_cell_measurement_theta_min       ?
_cell_measurement_theta_max       ?
 
_exptl_crystal_description        ?
_exptl_crystal_colour             Yellow
_exptl_crystal_size_max           ?
_exptl_crystal_size_mid           ?
_exptl_crystal_size_min           ?
_exptl_crystal_density_meas       ?
_exptl_crystal_density_diffrn     1.380
_exptl_crystal_density_method     'not measured'
_exptl_crystal_F_000              1328
_exptl_absorpt_coefficient_mu     0.857
_exptl_absorpt_correction_type    ?
_exptl_absorpt_correction_T_min   0.8200
_exptl_absorpt_correction_T_max   0.9257
_exptl_absorpt_process_details    semi empirical correction through MULTISCAN procedure (PLATON)
 
_exptl_special_details
;
 ?
;
 
_diffrn_ambient_temperature       293(2)
_diffrn_radiation_wavelength      0.71073
_diffrn_radiation_type            MoK\a
_diffrn_radiation_source          'fine-focus sealed tube'
_diffrn_radiation_monochromator   graphite
_diffrn_measurement_device_type   ?
_diffrn_measurement_method        ?
_diffrn_detector_area_resol_mean  ?
_diffrn_standards_number          ?
_diffrn_standards_interval_count  ?
_diffrn_standards_interval_time   ?
_diffrn_standards_decay_%         ?
_diffrn_reflns_number             17120
_diffrn_reflns_av_R_equivalents   0.0377
_diffrn_reflns_av_sigmaI/netI     0.0399
_diffrn_reflns_limit_h_min        -12
_diffrn_reflns_limit_h_max        11
_diffrn_reflns_limit_k_min        -15
_diffrn_reflns_limit_k_max        12
_diffrn_reflns_limit_l_min        -34
_diffrn_reflns_limit_l_max        30
_diffrn_reflns_theta_min          3.50
_diffrn_reflns_theta_max          27.48
_reflns_number_total              6963
_reflns_number_gt                 5696
_reflns_threshold_expression      >2sigma(I)
 
_computing_data_collection        ?
_computing_cell_refinement        ?
_computing_data_reduction         ?
_computing_structure_solution     ?
_computing_structure_refinement   'SHELXL-97 (Sheldrick, 1997)'
_computing_molecular_graphics     ?
_computing_publication_material   ?
 
_refine_special_details
;
 Refinement of F^2^ against ALL reflections.  The weighted R-factor wR and
 goodness of fit S are based on F^2^, conventional R-factors R are based
 on F, with F set to zero for negative F^2^. The threshold expression of
 F^2^ > 2sigma(F^2^) is used only for calculating R-factors(gt) etc. and is
 not relevant to the choice of reflections for refinement.  R-factors based
 on F^2^ are statistically about twice as large as those based on F, and R-
 factors based on ALL data will be even larger.
;
 
_refine_ls_structure_factor_coef  Fsqd
_refine_ls_matrix_type            full
_refine_ls_weighting_scheme       calc
_refine_ls_weighting_details
 'calc w=1/[\s^2^(Fo^2^)+(0.0377P)^2^+1.1183P] where P=(Fo^2^+2Fc^2^)/3'
_atom_sites_solution_primary      direct
_atom_sites_solution_secondary    difmap
_atom_sites_solution_hydrogens    geom
_refine_ls_hydrogen_treatment     mixed
_refine_ls_extinction_method      SHELXL
_refine_ls_extinction_coef        0.0000(5)
_refine_ls_extinction_expression
 'Fc^*^=kFc[1+0.001xFc^2^\l^3^/sin(2\q)]^-1/4^'
_refine_ls_abs_structure_details
 'Flack H D (1983), Acta Cryst. A39, 876-881'
_refine_ls_abs_structure_Flack    -0.05(2)
_refine_ls_number_reflns          6963
_refine_ls_number_parameters      336
_refine_ls_number_restraints      0
_refine_ls_R_factor_all           0.0582
_refine_ls_R_factor_gt            0.0399
_refine_ls_wR_factor_ref          0.0913
_refine_ls_wR_factor_gt           0.0829
_refine_ls_goodness_of_fit_ref    1.110
_refine_ls_restrained_S_all       1.110
_refine_ls_shift/su_max           3.183
_refine_ls_shift/su_mean          0.010
 
loop_
 _atom_site_label
 _atom_site_type_symbol
 _atom_site_fract_x
 _atom_site_fract_y
 _atom_site_fract_z
 _atom_site_U_iso_or_equiv
 _atom_site_adp_type
 _atom_site_occupancy
 _atom_site_symmetry_multiplicity
 _atom_site_calc_flag
 _atom_site_refinement_flags
 _atom_site_disorder_assembly
 _atom_site_disorder_group
C1 C 0.2505(2) -0.07479(18) 0.63015(8) 0.0460(8) Uani 1 1 d G . .
C2 C 0.3068(2) 0.00157(13) 0.59660(9) 0.0448(8) Uani 1 1 d G . .
C3 C 0.3962(2) -0.03597(16) 0.56004(8) 0.0486(9) Uani 1 1 d G . .
H3 H 0.4338 0.0151 0.5376 0.058 Uiso 1 1 calc R . .
C4 C 0.4293(2) -0.14988(18) 0.55703(8) 0.0498(9) Uani 1 1 d G . .
C5 C 0.3729(3) -0.22624(13) 0.59058(9) 0.0511(9) Uani 1 1 d G . .
H5 H 0.3951 -0.3024 0.5886 0.061 Uiso 1 1 calc R . .
C6 C 0.2835(2) -0.18869(16) 0.62714(8) 0.0536(9) Uani 1 1 d G . .
H6 H 0.2459 -0.2398 0.6496 0.064 Uiso 1 1 calc R . .
C7 C 0.1656(4) -0.0416(3) 0.67233(14) 0.0505(9) Uani 1 1 d . . .
H7 H 0.1406 -0.0995 0.6940 0.061 Uiso 1 1 calc R . .
C8 C 0.0381(5) 0.0734(4) 0.72941(15) 0.0607(11) Uani 1 1 d . . .
H8 H -0.0297 0.0129 0.7306 0.073 Uiso 1 1 calc R . .
C9 C -0.0355(4) 0.1858(4) 0.72834(15) 0.0609(11) Uani 1 1 d . . .
C10 C 0.2747(3) 0.3379(2) 0.64976(10) 0.0522(10) Uani 1 1 d G . .
C11 C 0.2393(3) 0.4293(2) 0.67964(11) 0.0671(12) Uani 1 1 d G . .
H11 H 0.1547 0.4314 0.6950 0.080 Uiso 1 1 calc R . .
C12 C 0.3303(4) 0.5175(2) 0.68657(12) 0.0816(16) Uani 1 1 d G . .
H12 H 0.3066 0.5787 0.7066 0.098 Uiso 1 1 calc R . .
C13 C 0.4567(3) 0.5144(2) 0.66363(13) 0.0795(15) Uani 1 1 d G . .
H13 H 0.5176 0.5734 0.6683 0.095 Uiso 1 1 calc R . .
C14 C 0.4921(3) 0.4230(3) 0.63376(13) 0.0846(14) Uani 1 1 d G . .
H14 H 0.5767 0.4209 0.6184 0.102 Uiso 1 1 calc R . .
C15 C 0.4011(3) 0.3347(2) 0.62682(10) 0.0699(12) Uani 1 1 d G . .
H15 H 0.4248 0.2736 0.6068 0.084 Uiso 1 1 calc R . .
C16 C -0.0177(3) 0.2009(3) 0.57997(9) 0.0544(9) Uani 1 1 d G . .
C17 C -0.0058(3) 0.1267(2) 0.53999(10) 0.0626(11) Uani 1 1 d G . .
H17 H 0.0706 0.0811 0.5371 0.075 Uiso 1 1 calc R . .
C18 C -0.1081(4) 0.1205(3) 0.50436(10) 0.0789(15) Uani 1 1 d G . .
H18 H -0.1001 0.0708 0.4776 0.095 Uiso 1 1 calc R . .
C19 C -0.2223(3) 0.1886(3) 0.50872(12) 0.0871(16) Uani 1 1 d G . .
H19 H -0.2908 0.1845 0.4849 0.104 Uiso 1 1 calc R . .
C20 C -0.2342(3) 0.2628(3) 0.54870(13) 0.100(2) Uani 1 1 d G . .
H20 H -0.3107 0.3084 0.5516 0.120 Uiso 1 1 calc R . .
C21 C -0.1319(3) 0.2690(3) 0.58433(10) 0.0793(14) Uani 1 1 d G . .
H21 H -0.1399 0.3187 0.6111 0.095 Uiso 1 1 calc R . .
C22 C 0.5568(5) -0.3062(4) 0.51377(18) 0.0711(12) Uani 1 1 d . . .
H22A H 0.5853 -0.3173 0.4794 0.085 Uiso 1 1 calc R . .
H22B H 0.4758 -0.3511 0.5192 0.085 Uiso 1 1 calc R . .
C23 C 0.6673(5) -0.3468(5) 0.5483(2) 0.0928(18) Uani 1 1 d . . .
H23A H 0.6826 -0.4260 0.5430 0.139 Uiso 1 1 calc R . .
H23B H 0.6404 -0.3344 0.5824 0.139 Uiso 1 1 calc R . .
H23C H 0.7494 -0.3059 0.5416 0.139 Uiso 1 1 calc R . .
C24 C 0.6120(5) -0.1066(4) 0.49440(18) 0.0727(13) Uani 1 1 d . . .
H24A H 0.6995 -0.1421 0.4892 0.087 Uiso 1 1 calc R . .
H24B H 0.6263 -0.0402 0.5150 0.087 Uiso 1 1 calc R . .
C25 C 0.5567(7) -0.0699(5) 0.4448(2) 0.105(2) Uani 1 1 d . . .
H25A H 0.6180 -0.0171 0.4297 0.157 Uiso 1 1 calc R . .
H25B H 0.4700 -0.0347 0.4496 0.157 Uiso 1 1 calc R . .
H25C H 0.5467 -0.1346 0.4235 0.157 Uiso 1 1 calc R . .
C26 C 0.1254(6) 0.0664(4) 0.77707(14) 0.0693(12) Uani 1 1 d . . .
H26A H 0.0665 0.0688 0.8061 0.083 Uiso 1 1 calc R . .
H26B H 0.1728 -0.0054 0.7775 0.083 Uiso 1 1 calc R . .
C27 C 0.2262(5) 0.1590(4) 0.78086(15) 0.0620(11) Uani 1 1 d . . .
C28 C 0.2183(3) 0.2593(2) 0.81303(10) 0.0623(12) Uani 1 1 d G . .
C29 C 0.1227(3) 0.2975(3) 0.84725(11) 0.0752(12) Uani 1 1 d G . .
H29 H 0.0440 0.2562 0.8528 0.090 Uiso 1 1 calc R . .
C30 C 0.1448(4) 0.3977(3) 0.87312(12) 0.0938(17) Uani 1 1 d G . .
H30 H 0.0809 0.4233 0.8960 0.113 Uiso 1 1 calc R . .
C31 C 0.2625(5) 0.4595(2) 0.86478(15) 0.1024(19) Uani 1 1 d G . .
H31 H 0.2773 0.5265 0.8821 0.123 Uiso 1 1 calc R . .
C32 C 0.3581(3) 0.4212(3) 0.83057(15) 0.1010(19) Uani 1 1 d G . .
H32 H 0.4368 0.4626 0.8250 0.121 Uiso 1 1 calc R . .
C33 C 0.3360(3) 0.3211(3) 0.80470(12) 0.0747(14) Uani 1 1 d G . .
C34 C 0.3455(6) 0.1678(5) 0.75592(18) 0.0741(14) Uani 1 1 d . . .
H34 H 0.3772 0.1160 0.7326 0.089 Uiso 1 1 calc R . .
N1 N 0.1200(3) 0.0593(3) 0.68370(11) 0.0519(8) Uani 1 1 d . . .
N2 N 0.5243(3) -0.1856(3) 0.52163(14) 0.0610(9) Uani 1 1 d . . .
N3 N 0.4125(5) 0.2641(5) 0.77005(18) 0.0840(15) Uani 1 1 d . . .
O1 O 0.2781(3) 0.1117(2) 0.59637(11) 0.0624(8) Uani 1 1 d . . .
O2 O -0.0043(3) 0.2567(3) 0.69380(11) 0.0658(8) Uani 1 1 d . . .
O3 O -0.1209(3) 0.2051(3) 0.76094(12) 0.0822(9) Uani 1 1 d . . .
O4 O -0.3345(5) 0.3164(6) 0.7264(3) 0.170(2) Uani 1 1 d . . .
Sn1 Sn 0.13592(3) 0.20343(2) 0.636720(10) 0.05098(10) Uani 1 1 d . . .
H1 H -0.3354 0.3685 0.7487 0.080 Uiso 1 1 d R . .
H2 H -0.3616 0.2440 0.7150 0.080 Uiso 1 1 d R . .
H4 H 0.485(5) 0.273(4) 0.7558(16) 0.051(13) Uiso 1 1 d . . .
 
loop_
 _atom_site_aniso_label
 _atom_site_aniso_U_11
 _atom_site_aniso_U_22
 _atom_site_aniso_U_33
 _atom_site_aniso_U_23
 _atom_site_aniso_U_13
 _atom_site_aniso_U_12
C1 0.0473(19) 0.0462(19) 0.044(2) 0.0048(17) 0.0013(17) -0.0041(15)
C2 0.0441(19) 0.046(2) 0.0442(19) -0.0002(16) 0.0036(16) -0.0043(16)
C3 0.046(2) 0.045(2) 0.055(2) 0.0002(17) 0.0082(17) -0.0055(17)
C4 0.047(2) 0.050(2) 0.053(2) -0.0042(18) 0.0026(18) -0.0015(17)
C5 0.052(2) 0.042(2) 0.059(2) -0.0051(16) 0.008(2) -0.0065(19)
C6 0.053(2) 0.050(2) 0.058(2) 0.0079(19) 0.0042(17) -0.0071(18)
C7 0.057(2) 0.051(2) 0.044(2) 0.0016(17) 0.0036(17) -0.0100(18)
C8 0.071(3) 0.061(3) 0.051(2) -0.003(2) 0.020(2) -0.013(2)
C9 0.058(2) 0.074(3) 0.050(2) -0.012(2) 0.0100(19) -0.006(2)
C10 0.067(2) 0.048(2) 0.042(2) 0.0025(16) 0.0013(17) 0.0043(18)
C11 0.078(3) 0.051(2) 0.073(3) -0.007(2) -0.003(2) 0.008(2)
C12 0.114(5) 0.053(3) 0.078(3) -0.013(2) -0.003(3) 0.010(3)
C13 0.102(4) 0.065(3) 0.071(3) -0.009(3) -0.007(3) -0.019(3)
C14 0.089(3) 0.091(4) 0.075(3) -0.011(3) 0.011(3) -0.027(3)
C15 0.083(3) 0.064(3) 0.063(3) -0.012(2) 0.012(2) -0.009(2)
C16 0.058(2) 0.053(2) 0.052(2) 0.006(2) 0.0085(17) 0.001(2)
C17 0.072(3) 0.059(3) 0.057(2) 0.001(2) 0.002(2) -0.001(2)
C18 0.108(4) 0.066(3) 0.062(3) 0.000(2) -0.013(3) 0.005(3)
C19 0.100(4) 0.093(4) 0.069(3) 0.015(3) -0.023(3) -0.003(4)
C20 0.096(4) 0.117(5) 0.086(4) 0.010(4) -0.009(3) 0.047(4)
C21 0.088(3) 0.081(3) 0.068(3) -0.008(2) -0.005(3) 0.026(3)
C22 0.071(3) 0.060(3) 0.082(3) -0.009(3) 0.017(2) 0.007(3)
C23 0.072(4) 0.083(4) 0.124(5) -0.001(4) 0.009(3) 0.015(3)
C24 0.067(3) 0.071(3) 0.080(3) -0.006(3) 0.024(3) 0.004(3)
C25 0.126(5) 0.091(4) 0.098(4) 0.003(4) 0.032(4) -0.006(4)
C26 0.104(4) 0.058(2) 0.046(2) 0.0074(18) 0.016(3) 0.003(3)
C27 0.072(3) 0.073(3) 0.041(2) 0.006(2) -0.003(2) 0.014(2)
C28 0.069(3) 0.068(3) 0.050(2) 0.006(2) -0.018(2) 0.007(2)
C29 0.078(3) 0.087(3) 0.061(2) -0.008(3) -0.007(2) 0.018(3)
C30 0.100(4) 0.097(4) 0.084(4) -0.023(3) -0.021(3) 0.024(4)
C31 0.123(5) 0.078(4) 0.105(4) -0.019(4) -0.037(5) 0.017(4)
C32 0.095(4) 0.094(4) 0.114(5) -0.002(4) -0.047(4) -0.006(4)
C33 0.071(3) 0.088(4) 0.065(3) 0.004(3) -0.024(2) 0.013(3)
C34 0.080(4) 0.083(3) 0.059(3) 0.000(2) -0.010(3) 0.014(3)
N1 0.057(2) 0.0518(18) 0.0471(16) -0.0021(14) 0.0111(16) -0.0052(17)
N2 0.0604(19) 0.049(2) 0.074(2) -0.0012(18) 0.0210(17) 0.0051(17)
N3 0.057(2) 0.117(4) 0.078(3) 0.015(3) -0.003(2) 0.011(3)
O1 0.0737(19) 0.0412(15) 0.0723(18) 0.0059(14) 0.0311(16) 0.0046(14)
O2 0.0695(19) 0.0716(19) 0.0563(17) -0.0004(15) 0.0154(15) 0.0136(15)
O3 0.081(2) 0.094(2) 0.0720(19) -0.015(2) 0.0347(17) 0.002(2)
O4 0.126(4) 0.181(6) 0.203(6) 0.042(5) 0.006(4) -0.009(4)
Sn1 0.05719(16) 0.04822(14) 0.04753(14) 0.00028(13) 0.00958(14) 0.00272(13)
 
_geom_special_details
;
 All esds (except the esd in the dihedral angle between two l.s. planes)
 are estimated using the full covariance matrix.  The cell esds are taken
 into account individually in the estimation of esds in distances, angles
 and torsion angles; correlations between esds in cell parameters are only
 used when they are defined by crystal symmetry.  An approximate (isotropic)
 treatment of cell esds is used for estimating esds involving l.s. planes.
;
 
loop_
 _geom_bond_atom_site_label_1
 _geom_bond_atom_site_label_2
 _geom_bond_distance
 _geom_bond_site_symmetry_2
 _geom_bond_publ_flag
C1 C2 1.3900 . ?
C1 C6 1.3900 . ?
C1 C7 1.459(4) . ?
C2 O1 1.334(3) . ?
C2 C3 1.3900 . ?
C3 C4 1.3900 . ?
C4 C5 1.3900 . ?
C4 N2 1.398(4) . ?
C5 C6 1.3900 . ?
C7 N1 1.312(5) . ?
C8 N1 1.475(5) . ?
C8 C9 1.517(6) . ?
C8 C26 1.541(7) . ?
C9 O3 1.234(5) . ?
C9 O2 1.286(5) . ?
C10 C11 1.3900 . ?
C10 C15 1.3900 . ?
C10 Sn1 2.128(2) . ?
C11 C12 1.3900 . ?
C12 C13 1.3900 . ?
C13 C14 1.3900 . ?
C14 C15 1.3900 . ?
C16 C17 1.3900 . ?
C16 C21 1.3900 . ?
C16 Sn1 2.145(2) . ?
C17 C18 1.3900 . ?
C18 C19 1.3900 . ?
C19 C20 1.3900 . ?
C20 C21 1.3900 . ?
C22 N2 1.479(5) . ?
C22 C23 1.508(7) . ?
C24 N2 1.467(5) . ?
C24 C25 1.499(7) . ?
C26 C27 1.483(7) . ?
C27 C34 1.356(7) . ?
C27 C28 1.469(5) . ?
C28 C29 1.3900 . ?
C28 C33 1.3900 . ?
C29 C30 1.3900 . ?
C30 C31 1.3900 . ?
C31 C32 1.3900 . ?
C32 C33 1.3900 . ?
C33 N3 1.373(6) . ?
C34 N3 1.372(7) . ?
N1 Sn1 2.126(3) . ?
O1 Sn1 2.076(3) . ?
O2 Sn1 2.155(3) . ?
 
loop_
 _geom_angle_atom_site_label_1
 _geom_angle_atom_site_label_2
 _geom_angle_atom_site_label_3
 _geom_angle
 _geom_angle_site_symmetry_1
 _geom_angle_site_symmetry_3
 _geom_angle_publ_flag
C2 C1 C6 120.0 . . ?
C2 C1 C7 123.6(2) . . ?
C6 C1 C7 116.1(2) . . ?
O1 C2 C3 116.35(19) . . ?
O1 C2 C1 123.64(19) . . ?
C3 C2 C1 120.0 . . ?
C2 C3 C4 120.0 . . ?
C3 C4 C5 120.0 . . ?
C3 C4 N2 119.4(2) . . ?
C5 C4 N2 120.6(2) . . ?
C6 C5 C4 120.0 . . ?
C5 C6 C1 120.0 . . ?
N1 C7 C1 128.4(3) . . ?
N1 C8 C9 110.2(3) . . ?
N1 C8 C26 112.0(4) . . ?
C9 C8 C26 109.3(4) . . ?
O3 C9 O2 123.4(5) . . ?
O3 C9 C8 118.4(4) . . ?
O2 C9 C8 118.2(3) . . ?
C11 C10 C15 120.0 . . ?
C11 C10 Sn1 121.02(14) . . ?
C15 C10 Sn1 118.96(14) . . ?
C10 C11 C12 120.0 . . ?
C13 C12 C11 120.0 . . ?
C12 C13 C14 120.0 . . ?
C15 C14 C13 120.0 . . ?
C14 C15 C10 120.0 . . ?
C17 C16 C21 120.0 . . ?
C17 C16 Sn1 119.61(15) . . ?
C21 C16 Sn1 120.32(15) . . ?
C16 C17 C18 120.0 . . ?
C19 C18 C17 120.0 . . ?
C20 C19 C18 120.0 . . ?
C19 C20 C21 120.0 . . ?
C20 C21 C16 120.0 . . ?
N2 C22 C23 112.2(4) . . ?
N2 C24 C25 114.2(4) . . ?
C27 C26 C8 113.0(3) . . ?
C34 C27 C28 105.8(4) . . ?
C34 C27 C26 127.2(4) . . ?
C28 C27 C26 127.0(4) . . ?
C29 C28 C33 120.0 . . ?
C29 C28 C27 133.3(3) . . ?
C33 C28 C27 106.7(3) . . ?
C30 C29 C28 120.0 . . ?
C29 C30 C31 120.0 . . ?
C32 C31 C30 120.0 . . ?
C31 C32 C33 120.0 . . ?
N3 C33 C32 132.0(3) . . ?
N3 C33 C28 108.0(3) . . ?
C32 C33 C28 120.0 . . ?
C27 C34 N3 110.3(5) . . ?
C7 N1 C8 118.9(3) . . ?
C7 N1 Sn1 124.6(2) . . ?
C8 N1 Sn1 116.1(3) . . ?
C4 N2 C22 122.3(3) . . ?
C4 N2 C24 122.6(3) . . ?
C22 N2 C24 114.7(3) . . ?
C34 N3 C33 109.3(4) . . ?
C2 O1 Sn1 130.7(2) . . ?
C9 O2 Sn1 118.2(3) . . ?
O1 Sn1 C10 92.45(11) . . ?
O1 Sn1 N1 86.42(11) . . ?
C10 Sn1 N1 123.46(12) . . ?
O1 Sn1 C16 95.81(12) . . ?
C10 Sn1 C16 125.49(11) . . ?
N1 Sn1 C16 110.81(12) . . ?
O1 Sn1 O2 162.75(11) . . ?
C10 Sn1 O2 94.44(11) . . ?
N1 Sn1 O2 76.59(12) . . ?
C16 Sn1 O2 93.02(11) . . ?
 
loop_
 _geom_torsion_atom_site_label_1
 _geom_torsion_atom_site_label_2
 _geom_torsion_atom_site_label_3
 _geom_torsion_atom_site_label_4
 _geom_torsion
 _geom_torsion_site_symmetry_1
 _geom_torsion_site_symmetry_2
 _geom_torsion_site_symmetry_3
 _geom_torsion_site_symmetry_4
 _geom_torsion_publ_flag
C6 C1 C2 O1 178.6(3) . . . . ?
C7 C1 C2 O1 -7.1(3) . . . . ?
C6 C1 C2 C3 0.0 . . . . ?
C7 C1 C2 C3 174.3(3) . . . . ?
O1 C2 C3 C4 -178.7(3) . . . . ?
C1 C2 C3 C4 0.0 . . . . ?
C2 C3 C4 C5 0.0 . . . . ?
C2 C3 C4 N2 -176.9(3) . . . . ?
C3 C4 C5 C6 0.0 . . . . ?
N2 C4 C5 C6 176.9(3) . . . . ?
C4 C5 C6 C1 0.0 . . . . ?
C2 C1 C6 C5 0.0 . . . . ?
C7 C1 C6 C5 -174.7(3) . . . . ?
C2 C1 C7 N1 5.7(5) . . . . ?
C6 C1 C7 N1 -179.8(3) . . . . ?
N1 C8 C9 O3 171.5(4) . . . . ?
C26 C8 C9 O3 -65.0(5) . . . . ?
N1 C8 C9 O2 -9.3(6) . . . . ?
C26 C8 C9 O2 114.2(4) . . . . ?
C15 C10 C11 C12 0.0 . . . . ?
Sn1 C10 C11 C12 -178.3(2) . . . . ?
C10 C11 C12 C13 0.0 . . . . ?
C11 C12 C13 C14 0.0 . . . . ?
C12 C13 C14 C15 0.0 . . . . ?
C13 C14 C15 C10 0.0 . . . . ?
C11 C10 C15 C14 0.0 . . . . ?
Sn1 C10 C15 C14 178.4(2) . . . . ?
C21 C16 C17 C18 0.0 . . . . ?
Sn1 C16 C17 C18 176.8(2) . . . . ?
C16 C17 C18 C19 0.0 . . . . ?
C17 C18 C19 C20 0.0 . . . . ?
C18 C19 C20 C21 0.0 . . . . ?
C19 C20 C21 C16 0.0 . . . . ?
C17 C16 C21 C20 0.0 . . . . ?
Sn1 C16 C21 C20 -176.8(2) . . . . ?
N1 C8 C26 C27 64.1(5) . . . . ?
C9 C8 C26 C27 -58.3(5) . . . . ?
C8 C26 C27 C34 -77.2(6) . . . . ?
C8 C26 C27 C28 103.9(5) . . . . ?
C34 C27 C28 C29 -179.4(3) . . . . ?
C26 C27 C28 C29 -0.3(6) . . . . ?
C34 C27 C28 C33 -0.1(4) . . . . ?
C26 C27 C28 C33 179.0(4) . . . . ?
C33 C28 C29 C30 0.0 . . . . ?
C27 C28 C29 C30 179.2(4) . . . . ?
C28 C29 C30 C31 0.0 . . . . ?
C29 C30 C31 C32 0.0 . . . . ?
C30 C31 C32 C33 0.0 . . . . ?
C31 C32 C33 N3 -179.0(4) . . . . ?
C31 C32 C33 C28 0.0 . . . . ?
C29 C28 C33 N3 179.2(3) . . . . ?
C27 C28 C33 N3 -0.2(3) . . . . ?
C29 C28 C33 C32 0.0 . . . . ?
C27 C28 C33 C32 -179.4(3) . . . . ?
C28 C27 C34 N3 0.4(5) . . . . ?
C26 C27 C34 N3 -178.7(4) . . . . ?
C1 C7 N1 C8 -178.3(4) . . . . ?
C1 C7 N1 Sn1 9.0(6) . . . . ?
C9 C8 N1 C7 -164.5(4) . . . . ?
C26 C8 N1 C7 73.6(5) . . . . ?
C9 C8 N1 Sn1 8.8(4) . . . . ?
C26 C8 N1 Sn1 -113.1(3) . . . . ?
C3 C4 N2 C22 -175.4(3) . . . . ?
C5 C4 N2 C22 7.7(5) . . . . ?
C3 C4 N2 C24 13.1(5) . . . . ?
C5 C4 N2 C24 -163.9(3) . . . . ?
C23 C22 N2 C4 -87.3(5) . . . . ?
C23 C22 N2 C24 84.9(5) . . . . ?
C25 C24 N2 C4 -93.5(5) . . . . ?
C25 C24 N2 C22 94.3(5) . . . . ?
C27 C34 N3 C33 -0.5(6) . . . . ?
C32 C33 N3 C34 179.5(3) . . . . ?
C28 C33 N3 C34 0.4(4) . . . . ?
C3 C2 O1 Sn1 171.7(2) . . . . ?
C1 C2 O1 Sn1 -7.0(4) . . . . ?
O3 C9 O2 Sn1 -175.3(3) . . . . ?
C8 C9 O2 Sn1 5.5(5) . . . . ?
C2 O1 Sn1 C10 138.4(3) . . . . ?
C2 O1 Sn1 N1 15.0(3) . . . . ?
C2 O1 Sn1 C16 -95.6(3) . . . . ?
C2 O1 Sn1 O2 24.8(7) . . . . ?
C11 C10 Sn1 O1 -175.90(17) . . . . ?
C15 C10 Sn1 O1 5.76(18) . . . . ?
C11 C10 Sn1 N1 -88.57(19) . . . . ?
C15 C10 Sn1 N1 93.09(19) . . . . ?
C11 C10 Sn1 C16 85.18(18) . . . . ?
C15 C10 Sn1 C16 -93.16(18) . . . . ?
C11 C10 Sn1 O2 -11.72(17) . . . . ?
C15 C10 Sn1 O2 169.94(17) . . . . ?
C7 N1 Sn1 O1 -15.1(3) . . . . ?
C8 N1 Sn1 O1 172.0(3) . . . . ?
C7 N1 Sn1 C10 -105.7(3) . . . . ?
C8 N1 Sn1 C10 81.4(3) . . . . ?
C7 N1 Sn1 C16 79.8(3) . . . . ?
C8 N1 Sn1 C16 -93.1(3) . . . . ?
C7 N1 Sn1 O2 167.9(4) . . . . ?
C8 N1 Sn1 O2 -5.0(3) . . . . ?
C17 C16 Sn1 O1 14.21(18) . . . . ?
C21 C16 Sn1 O1 -168.98(17) . . . . ?
C17 C16 Sn1 C10 111.42(18) . . . . ?
C21 C16 Sn1 C10 -71.77(19) . . . . ?
C17 C16 Sn1 N1 -74.16(19) . . . . ?
C21 C16 Sn1 N1 102.66(18) . . . . ?
C17 C16 Sn1 O2 -150.95(18) . . . . ?
C21 C16 Sn1 O2 25.86(18) . . . . ?
C9 O2 Sn1 O1 -10.4(6) . . . . ?
C9 O2 Sn1 C10 -123.7(3) . . . . ?
C9 O2 Sn1 N1 -0.3(3) . . . . ?
C9 O2 Sn1 C16 110.4(3) . . . . ?
 
_diffrn_measured_fraction_theta_max    0.983
_diffrn_reflns_theta_full              27.48
_diffrn_measured_fraction_theta_full   0.983
_refine_diff_density_max    0.378
_refine_diff_density_min   -0.357
_refine_diff_density_rms    0.056
